# Supplementary material for: Role of evolutionary and ecological factors in the reproductive success and the spatial genetic structure of the temperate gorgonian Paramuricea clavata
Source: PubMed Central journal article supplement (PMC3686208; doi:10.1002/ece3.588), 2013-05-08
Supplement: ece30003-1765-SD1.pdf [file ece30003-1765-SD1.pdf]

**Role of evolutionary and ecological factors in the reproductive success and the spatial genetic structure of the temperate gorgonian *Paramuricea clavata***

**ONLINE SUPPORTING INFORMATION**

K. MOKHTAR-JAMAÏ<sup>\*+</sup>, R. COMA<sup>‡</sup>, J. WANG<sup>†</sup>, F. ZUBERER<sup>§</sup>, J.-P. FÉRAL<sup>+</sup>, D. AURELLE<sup>+</sup>

*\* Institut National de Recherche Halieutique (INRH), 2 rue Tiznit Casablanca Morocco, <sup>+</sup> Aix-Marseille Université, CNRS, UMR 7263 IMBE, Station Marine d'Endoume, Chemin de la Batterie des Lions, 13007 Marseille, France, <sup>‡</sup> Centre d'Estudis Avançats de Blanes (CEAB-CSIC), Accés Cala Sant Francesc 14, 17300 Blanes, Girona, Catalonia, Spain,*

*<sup>†</sup> Institute of Zoology, Zoological Society of London, Regent's Park, London NW1 4RY, UK,*

*<sup>§</sup> Aix-Marseille Université, CNRS, UMS 3470 Pythéas, Station Marine d'Endoume, Chemin de la Batterie des Lions, 13007 Marseille, France.*

*Correspondence:* Kenza Mokhtar-Jamaï / Didier Aurelle ; E-mail: [mokhtarjamaikenza@hotmail.com](mailto:mokhtarjamaikenza@hotmail.com) / [didier.aurelle@univ-amu.fr](mailto:didier.aurelle@univ-amu.fr)

Table S1: Information about the examined colonies (N=100): **sex** (M = male, F= female, I= Indeterminate); **size** (maximum height in cm); **colonies' stage class for kinship relationship** (C0= <15 cm, C1= 15-30 cm, C2= 31-50 cm, C3= >51 cm); **estimated reproductive output** [computed on the basis of the biometry and gonadal production of the colonies (Coma *et al.* 1995 a, b, 1998)]; **male reproductive success** (i.e., the number of larvae that each male sired)

| Colony | Sex | Size | Stage class for kinship relationship | Estimated Reproductive output | Reproductive success |
|--------|-----|------|--------------------------------------|-------------------------------|----------------------|
| A1     | M   | 18   | C1                                   | 53398                         | 3                    |
| A3     | F   | 30   | C1                                   | 70730                         | /                    |
| A4     | F   | 36   | C2                                   | 183430                        | /                    |
| A5     | M   | 16   | C1                                   | 43760                         | 3                    |
| A6     | F   | 27   | C1                                   | 59194                         | /                    |
| A7     | F   | 43   | C2                                   | 308933                        | /                    |
| A8     | F   | 22   | C1                                   | 44926                         | /                    |
| A9     | M   | 21   | C1                                   | 106817                        | 0                    |
| A10    | F   | 23   | C1                                   | 48431                         | /                    |
| A11    | I   | 12   | C0                                   | /                             | /                    |
| A12    | I   | 8    | C0                                   | /                             | /                    |
| A13    | I   | 6    | C0                                   | /                             | /                    |
| A14    | I   | 8    | C0                                   | /                             | /                    |
| A15    | I   | 5    | C0                                   | /                             | /                    |
| B1     | M   | 40   | C2                                   | 451962                        | 7                    |
| B2     | F   | 17   | C1                                   | 5719                          | /                    |
| B3     | F   | 41   | C2                                   | 285041                        | /                    |
| B4     | F   | 72   | C3                                   | 713129                        | /                    |
| B5     | M   | 20   | C1                                   | 63805                         | 3                    |
| B6     | M   | 22   | C1                                   | 115553                        | 0                    |
| B7     | F   | 20   | C1                                   | 7527                          | /                    |
| B8     | M   | 19   | C1                                   | 58507                         | 0                    |
| B9     | M   | 35   | C2                                   | 359369                        | 3                    |
| B10    | M   | 17   | C1                                   | 48481                         | 0                    |
| B11    | I   | 6    | C0                                   | /                             | /                    |
| B12    | I   | 5    | C0                                   | /                             | /                    |
| B13    | I   | 14   | C0                                   | /                             | /                    |
| B14    | I   | 6    | C0                                   | /                             | /                    |
| B16    | I   | 4    | C0                                   | /                             | /                    |
| B17    | I   | 4    | C0                                   | /                             | /                    |
| C1     | M   | 26   | C1                                   | 138517                        | 5                    |
| C2     | M   | 16   | C1                                   | 43760                         | 3                    |
| C3     | F   | 19   | C1                                   | 6902                          | /                    |
| C4     | M   | 20   | C1                                   | 63805                         | 0                    |
| C5     | F   | 40   | C2                                   | 219179                        | /                    |
| C6     | M   | 30   | C1                                   | 176415                        | 11                   |
| C7     | F   | 29   | C1                                   | 66792                         | /                    |
| C8     | M   | 15   | C1                                   | 40361                         | 0                    |
| C9     | I   | 8    | C0                                   | /                             | /                    |
| C10    | I   | 12   | C0                                   | /                             | /                    |
| C11    | I   | 13   | C0                                   | /                             | /                    |
| D1     | F   | 34   | C2                                   | 166545                        | /                    |
| D2     | M   | 18   | C1                                   | 53398                         | 0                    |
| D3     | M   | 46   | C2                                   | 662358                        | 10                   |
| D4     | M   | 40   | C2                                   | 451962                        | 15                   |

|     |   |    |    |         |    |
|-----|---|----|----|---------|----|
| D5  | M | 15 | C1 | 40361   | 0  |
| D6  | I | 11 | C0 | /       | /  |
| D7  | I | 11 | C0 | /       | /  |
| D8  | I | 11 | C0 | /       | /  |
| E1  | M | 31 | C2 | 292729  | 0  |
| E2  | F | 33 | C2 | 158351  | /  |
| E3  | F | 36 | C2 | 183430  | /  |
| E4  | M | 35 | C2 | 359369  | 0  |
| E5  | M | 17 | C1 | 48481   | 0  |
| E6  | I | 3  | C0 | /       | /  |
| E7  | I | 10 | C0 | /       | /  |
| E8  | I | 6  | C0 | /       | /  |
| E9  | I | 5  | C0 | /       | /  |
| E10 | I | 7  | C0 | /       | /  |
| E11 | I | 3  | C0 | /       | /  |
| F1  | M | 23 | C1 | 124569  | 0  |
| F2  | F | 18 | C1 | 6299    | /  |
| F3  | F | 24 | C1 | 52043   | /  |
| F4  | F | 18 | C1 | 6299    | /  |
| F5  | M | 25 | C1 | 143419  | 0  |
| F6  | I | 13 | C0 | /       | /  |
| G1  | F | 39 | C2 | 209999  | /  |
| G2  | M | 40 | C2 | 451962  | 3  |
| G3  | M | 16 | C1 | 43760   | 0  |
| G4  | M | 16 | C1 | 43760   | 0  |
| G5  | F | 20 | C1 | 7527    | /  |
| G6  | M | 58 | C3 | 936532  | 0  |
| G7  | M | 22 | C1 | 115553  | 1  |
| G8  | I | 14 | C0 | /       | /  |
| G9  | I | 4  | C0 | /       | /  |
| G10 | I | 12 | C0 | /       | /  |
| H2  | M | 17 | C1 | 48481   | 0  |
| H3  | F | 32 | C2 | 150326  | /  |
| H4  | F | 50 | C2 | 402589  | /  |
| H5  | M | 18 | C1 | 53398   | 1  |
| H6  | F | 29 | C1 | 66792   | /  |
| H7  | F | 17 | C1 | 5719    | /  |
| H8  | I | 10 | C0 | /       | /  |
| H9  | I | 11 | C0 | /       | /  |
| I1  | M | 61 | C3 | 1019851 | 10 |
| I2  | M | 35 | C2 | 359369  | 7  |
| I3  | F | 38 | C2 | 200980  | /  |
| I4  | M | 63 | C3 | 1076998 | 8  |
| J1  | M | 63 | C3 | 1076998 | 8  |
| J2  | F | 56 | C3 | 466352  | /  |
| J3  | F | 33 | C2 | 158351  | /  |
| J4  | F | 92 | C3 | 1079139 | /  |
| K1  | F | 50 | C2 | 402589  | /  |
| K2  | F | 33 | C2 | 158351  | /  |
| K3  | M | 26 | C1 | 138517  | 19 |
| K5  | M | 34 | C2 | 342188  | 0  |
| K6  | M | 35 | C2 | 359369  | 5  |
| K7  | F | 38 | C2 | 200980  | /  |
| K8  | M | 60 | C3 | 991757  | 7  |
| K9  | F | 36 | C2 | 183430  | /  |

---

Table S2. (a)  $f$  estimator of  $F_{IS}$  for the larval pool, the larval pool combined with parental population and all the colonies (in bold significant values after FDR); (b) null allele frequency per locus for all the colonies

| (a) $F_{IS}$                        |       |              |              |              |              |              |       |                  |
|-------------------------------------|-------|--------------|--------------|--------------|--------------|--------------|-------|------------------|
| sample                              | locus | Parcla<br>09 | Parcla<br>10 | Parcla<br>12 | Parcla<br>14 | Parcla<br>17 | Par_d | Over all<br>loci |
| <i>Based on 5 loci:</i>             |       |              |              |              |              |              |       |                  |
| Larval pool                         |       | 0.08         | /            | <b>0.13</b>  | -0.02        | -0.06        | 0.05  | <b>0.04</b>      |
| Larval pool and parental population |       | 0.06         | /            | <b>0.13</b>  | -0.02        | <b>-0.05</b> | 0.05  | <b>0.04</b>      |
| <i>Based on 6 loci</i>              |       |              |              |              |              |              |       |                  |
| Whole colonies                      |       | -0.04        | -0.07        | 0.14         | -0.04        | <b>0</b>     | 0     | 0                |

  

| (b) Null allele frequencies |       |              |              |              |              |              |       |                  |
|-----------------------------|-------|--------------|--------------|--------------|--------------|--------------|-------|------------------|
| sample                      | locus | Parcla<br>09 | Parcla<br>10 | Parcla<br>12 | Parcla<br>14 | Parcla<br>17 | Par_d | Over all<br>loci |
| <i>Based on 6 loci:</i>     |       |              |              |              |              |              |       |                  |
| Whole colonies              |       | 0            | 0            | 0.06         | 0            | 0.03         | 0     | 0.02             |

Table S3. (a)  $f$  estimator of  $F_{IS}$  for the larval pool, the larval pool combined with parental population and all the colonies (in bold significant values after FDR); (b) null allele frequency per locus for the all the colonies

| (a) Fis                             |       |              |              |              |              |              |       |                  |
|-------------------------------------|-------|--------------|--------------|--------------|--------------|--------------|-------|------------------|
| sample                              | locus | Parcla<br>09 | Parcla<br>10 | Parcla<br>12 | Parcla<br>14 | Parcla<br>17 | Par_d | Over all<br>loci |
| <i>Based on 5 loci:</i>             |       |              |              |              |              |              |       |                  |
| Larval pool                         |       | 0.08         | /            | <b>0.13</b>  | -0.02        | -0.06        | 0.05  | <b>0.04</b>      |
| Larval pool and parental population |       | 0.06         | /            | <b>0.13</b>  | -0.02        | <b>-0.05</b> | 0.05  | <b>0.04</b>      |
| <i>Based on 6 loci</i>              |       |              |              |              |              |              |       |                  |
| Whole colonies                      |       | -0.04        | -0.07        | 0.14         | -0.04        | <b>0</b>     | 0     | 0                |

  

| (b) Null allele frequencies |       |              |              |              |              |              |       |                  |
|-----------------------------|-------|--------------|--------------|--------------|--------------|--------------|-------|------------------|
| sample                      | locus | Parcla<br>09 | Parcla<br>10 | Parcla<br>12 | Parcla<br>14 | Parcla<br>17 | Par_d | Over all<br>loci |
| <i>Based on 6 loci:</i>     |       |              |              |              |              |              |       |                  |
| Whole colonies              |       | 0            | 0            | 0.06         | 0            | 0.03         | 0     | 0.02             |

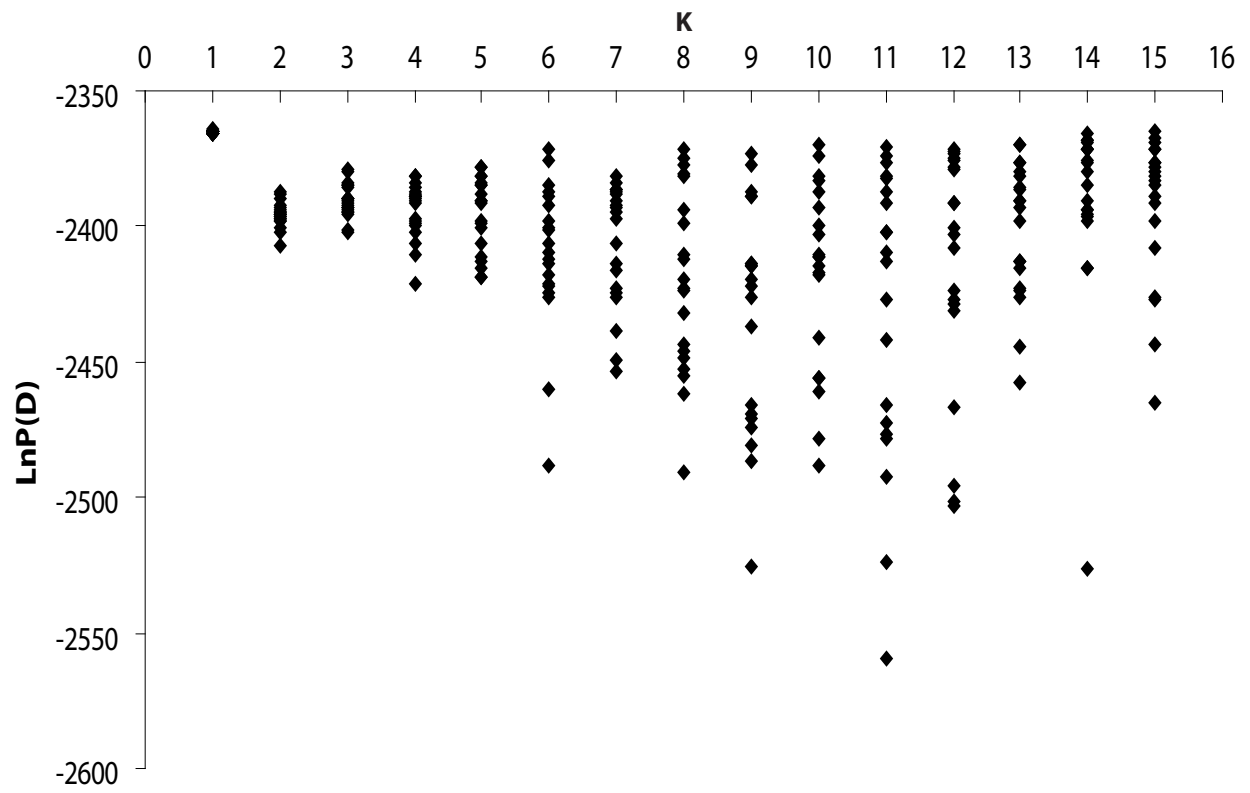

Figure S1. Plot of  $\text{LnP}(D)$  as a function of the number of clusters ( $K$ ) across the 20 runs
